# Supplementary material
Source: PubMed Central journal article supplement (PMC2610678)
Supplement: NIHMS69482-supplement-02.pdf [file NIHMS69482-supplement-02.pdf]

| HAART Patient | Alu-gag (Ct) | Gag (Ct)    | p-value     |                     |
|---------------|--------------|-------------|-------------|---------------------|
| ON            | 1            | 35.8 ± 0.70 | 36.2 ± 1.00 | 2x10 <sup>-02</sup> |
|               | 2            | 30.2 ± 3.98 | 33.8 ± 0.66 | 7x10 <sup>-07</sup> |
|               | 3            | 31.3 ± 4.61 | 34.3 ± 0.62 | 1x10 <sup>-04</sup> |
|               | 4            | 30.1 ± 4.09 | 32.1 ± 1.46 | 3x10 <sup>-03</sup> |
|               | 5            | 30.8 ± 4.74 | 35.0 ± 2.10 | 2x10 <sup>-06</sup> |
|               | 6            | 36.5 ± 2.90 | 37.3 ± 1.93 | 2x10 <sup>-02</sup> |
|               | 7            | 36.9 ± 4.32 | 40.0 ± 0.00 | 3x10 <sup>-05</sup> |
|               | 8            | 38.1 ± 3.50 | 39.1 ± 1.44 | 5x10 <sup>-02</sup> |
|               | 9            | 30.5 ± 6.32 | 35.2 ± 1.50 | 3x10 <sup>-04</sup> |
|               | 10           | 32.0 ± 4.16 | 34.5 ± 0.67 | 2x10 <sup>-04</sup> |
| OFF           | 11           | 21.5 ± 1.53 | 30.3 ± 0.90 | 2x10 <sup>-40</sup> |
|               | 12           | 23.9 ± 2.69 | 30.9 ± 3.53 | 2x10 <sup>-15</sup> |
|               | 13           | 26.2 ± 3.06 | 36.1 ± 2.61 | 2x10 <sup>-25</sup> |
|               | 14           | 27.5 ± 3.81 | 33.1 ± 2.23 | 2x10 <sup>-11</sup> |
|               | 15           | 22.9 ± 1.30 | 28.6 ± 3.49 | 2x10 <sup>-13</sup> |
|               | 16           | 32.9 ± 4.17 | 34.8 ± 1.38 | 4x10 <sup>-03</sup> |
